# Supplementary material for: Changes in Albuminuria and the Risk of Major Clinical Outcomes in Diabetes: Results From ADVANCE-ON
Source: Oxford University Press journal article supplement (doi:10.2337/dc17-1467), 2017-10-27
Supplement: dc171467supplementarydata.pdf [file dc171467supplementarydata.pdf]

## SUPPLEMENTARY DATA

**Supplementary Figure S1. Study design and identification of the study cohort**

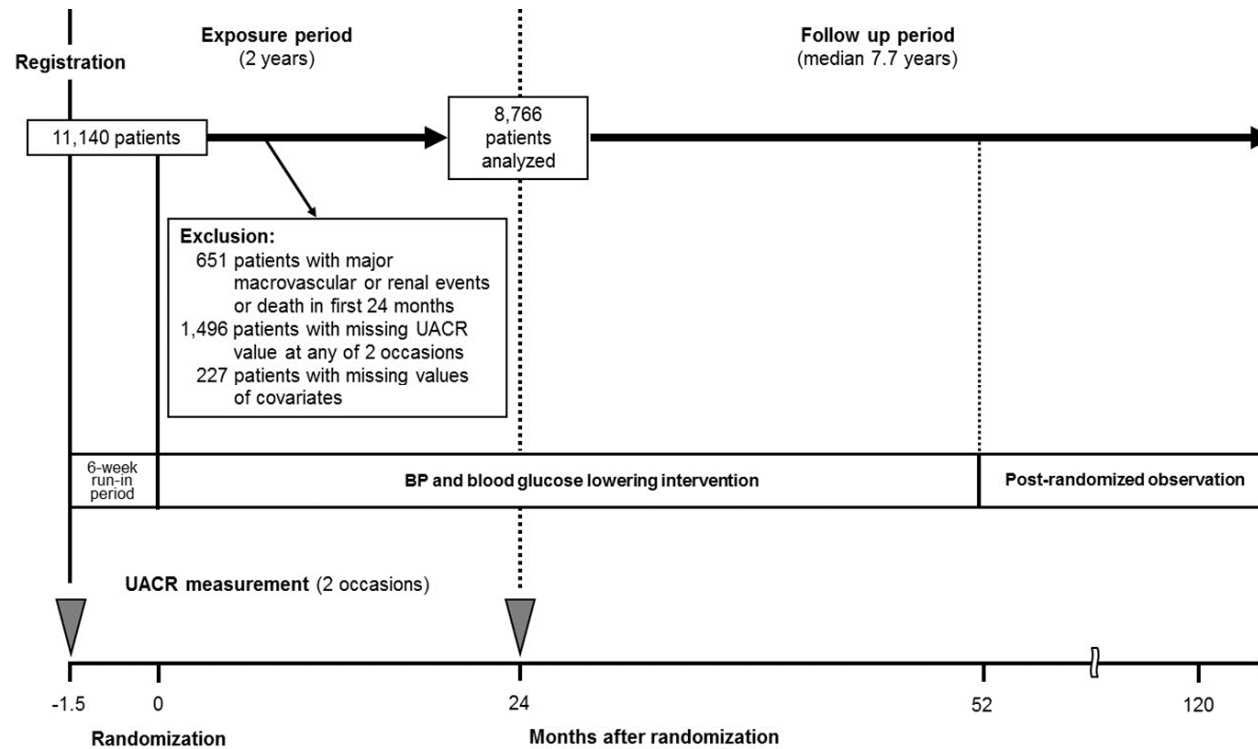

UACR=urine albumin-to-creatinine ratio; BP=blood pressure

SUPPLEMENTARY DATA

Supplementary Figure S2. Diagram showing the grouping of participants according to baseline and change in UACR to account for regression-to-the-mean

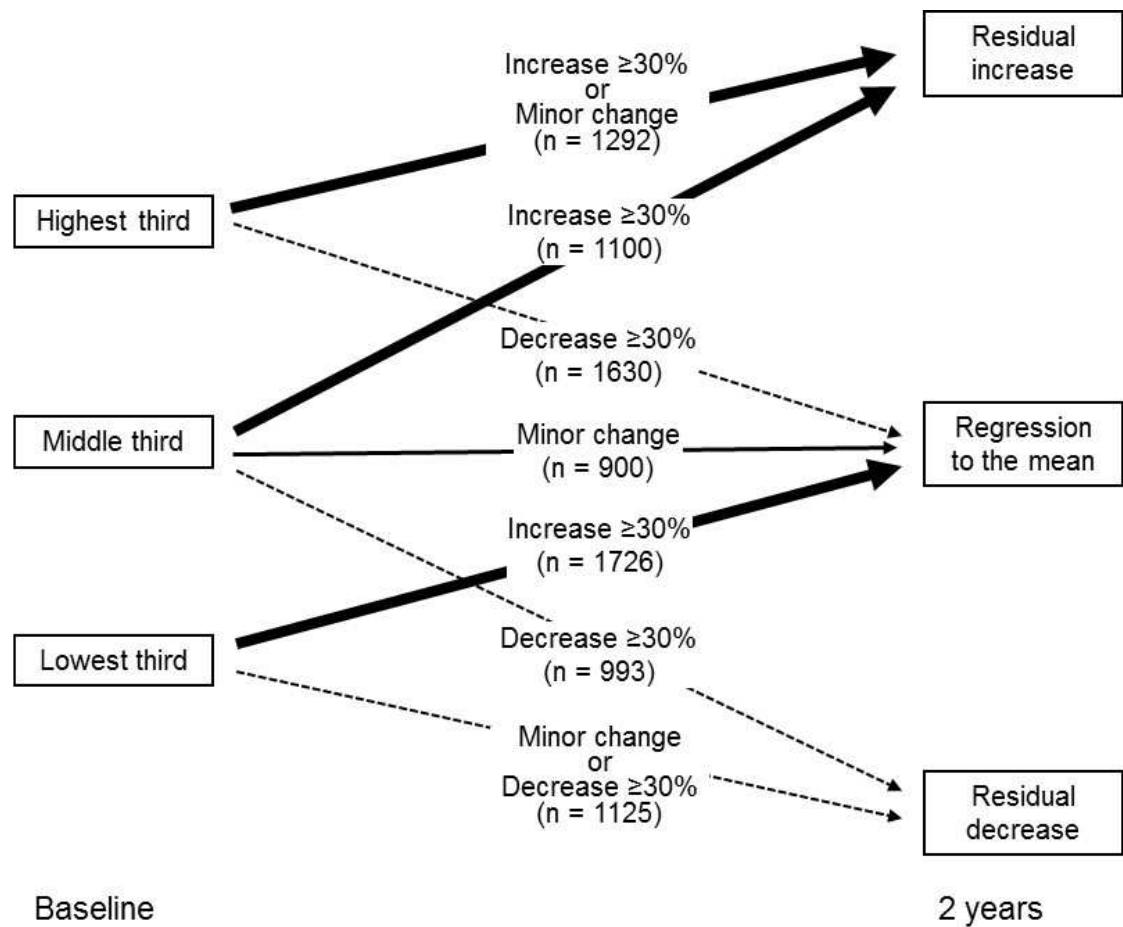

SUPPLEMENTARY DATA

Supplementary Figure S3. Adjusted† hazard ratios (HRs) and 95% confidence intervals (CIs) for study outcomes associated with UACR values at baseline^^; HRs (95% CIs) are shown for a one standard deviation increase before and after adjusting for regression to the mean

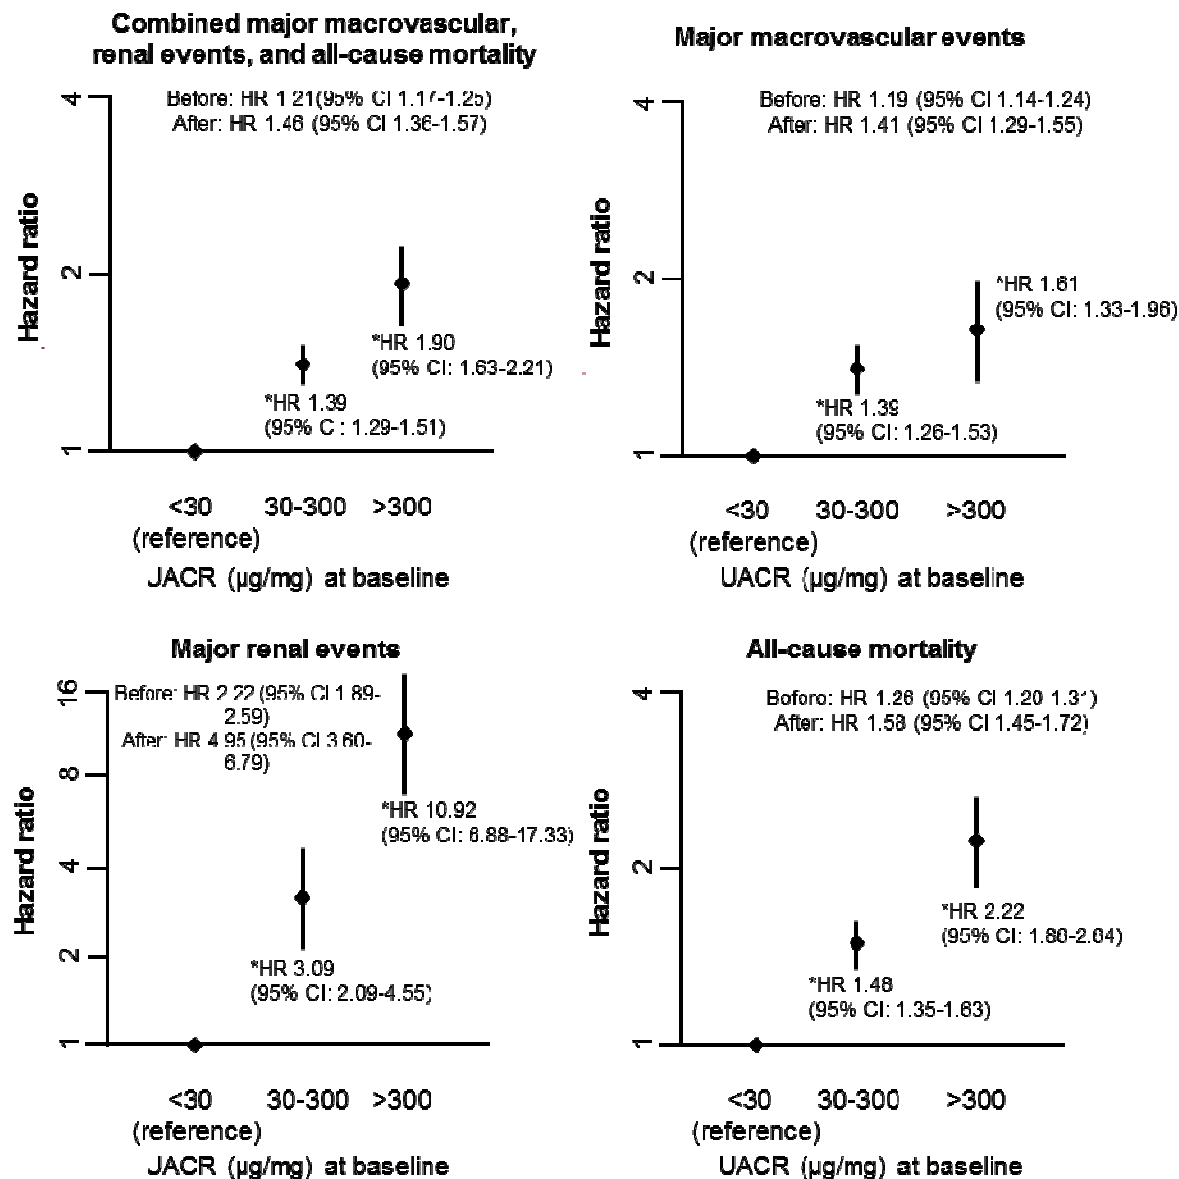

†^Adjusted for age, sex, region of residence, duration of diabetes, history of macrovascular diseases, smoking habit, drinking habit, body mass index, HbA1c, total cholesterol, log-transformed triglycerides, estimated glomerular filtration rate (eGFR) systolic blood pressure (BP) and ADVANCE trial treatment allocation (randomized blood pressure lowering and glucose control); \*HRs and 95% CIs indicate the association between baseline UACR level (30-300 and >300 µg/mg) and outcomes compared with the reference group (<30 µg/mg); adjustments as for analysis showing one standard deviation increase of UACR

SUPPLEMENTARY DATA

Supplementary Figure S4. The relationship between baseline and two-year UACR values (on the natural log scale) according to tenths of baseline UACR

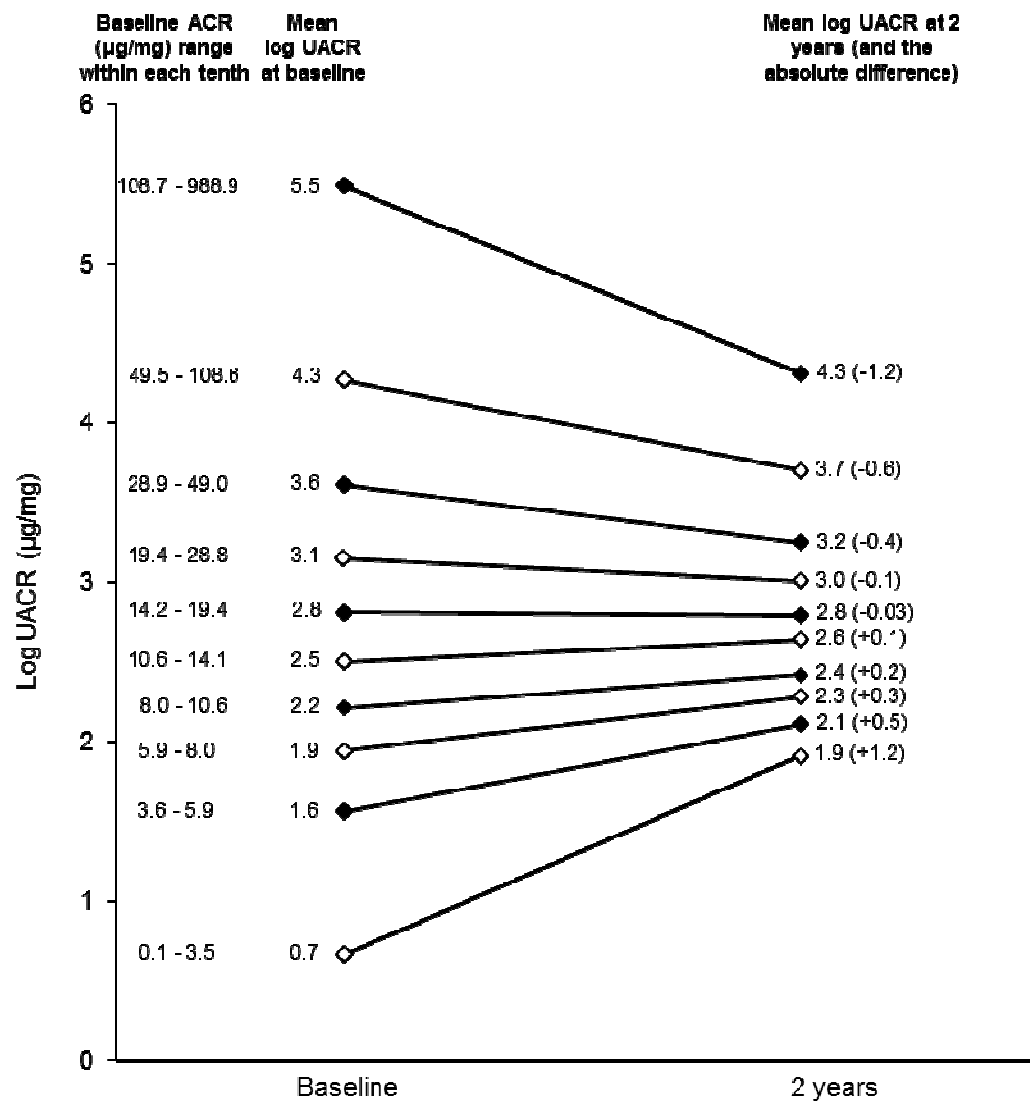

UACR=urine albumin-to-creatinine ratio

# SUPPLEMENTARY DATA

Supplementary Figure S5. Adjusted hazard ratios (HRs) and 95% confidence intervals (CIs) for major macrovascular events according to baseline eGFR and systolic BP\*

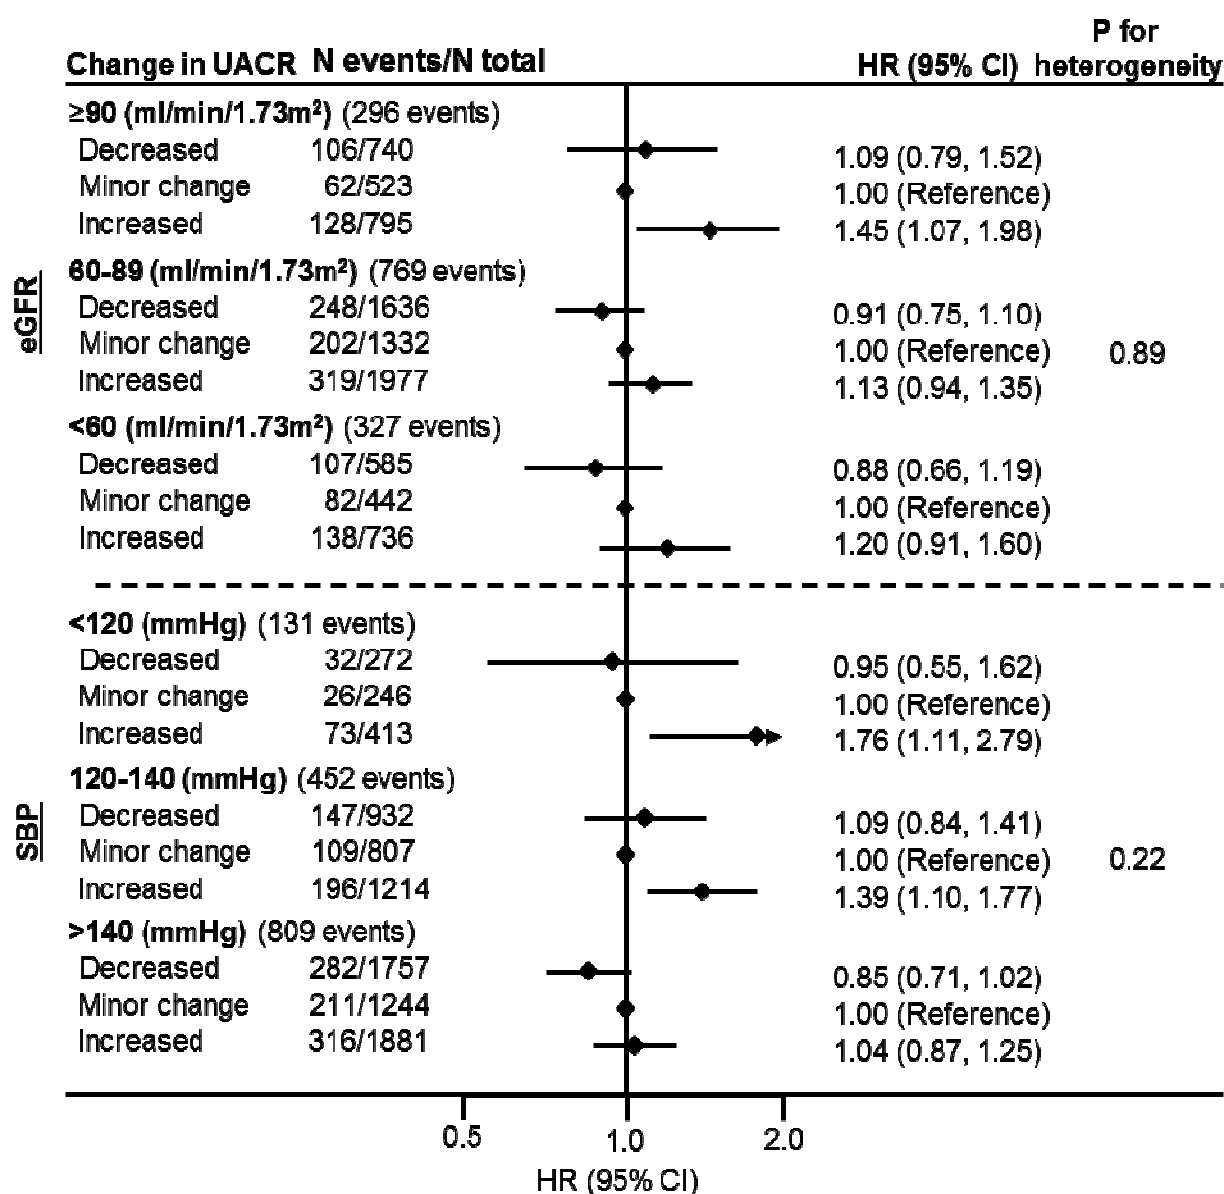

\*Adjusted for age, sex, region of residence, duration of diabetes, history of macrovascular diseases, smoking habit, drinking habit, body mass index, HbA1c, total cholesterol, log-transformed triglycerides, estimated glomerular filtration rate (eGFR), systolic blood pressure (BP), log-transformed baseline urine albumin-to-creatinine ratio (UACR), change in systolic BP, change in eGFR and ADVANCE trial treatment allocation (randomized blood pressure lowering and glucose control)

# SUPPLEMENTARY DATA

**Supplementary Figure S6. Adjusted hazard ratios (HRs) and 95% confidence intervals (CIs) for major macrovascular events according to sociodemographic information and comorbidities\***

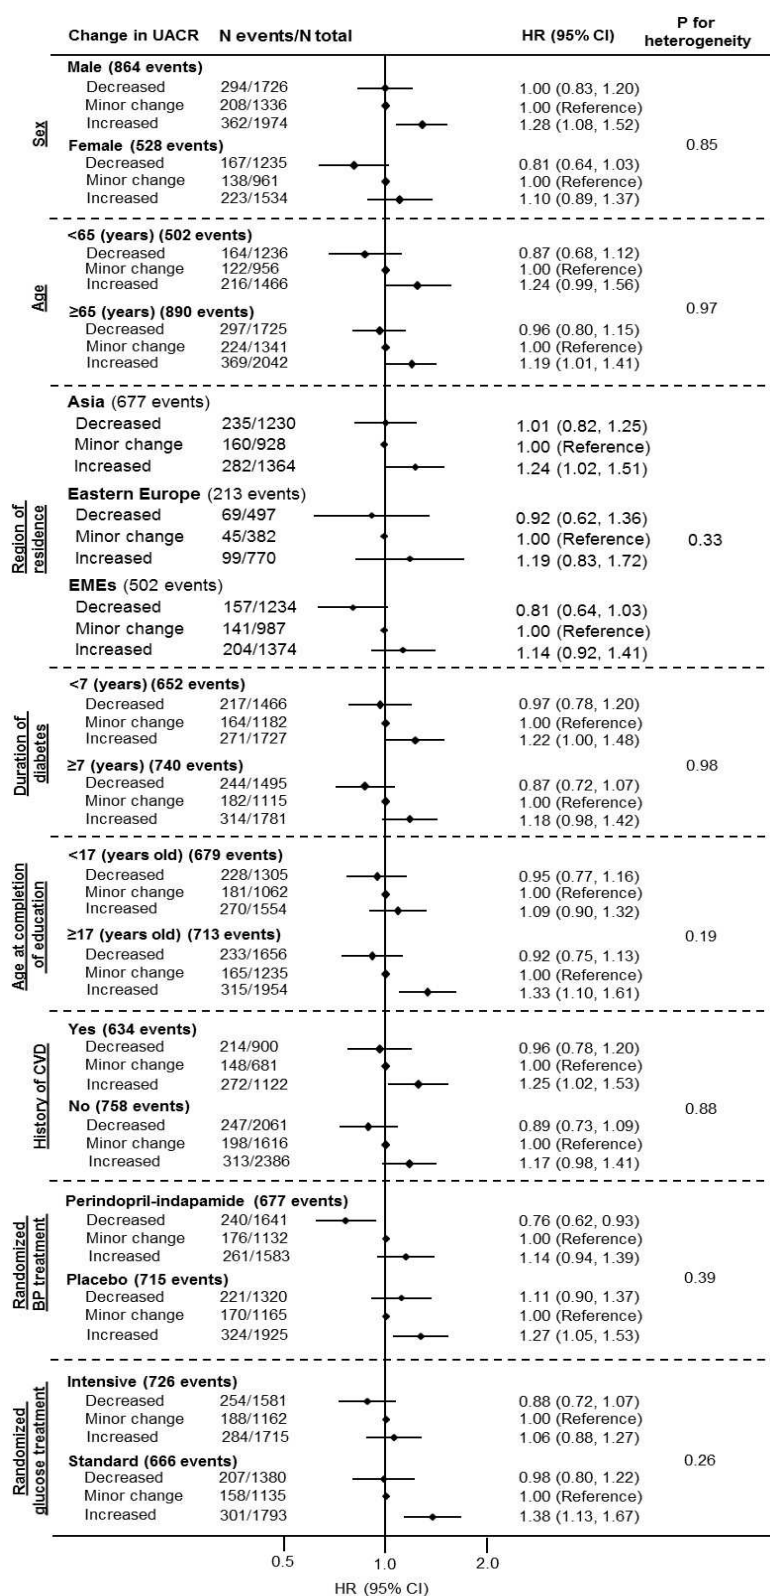

## SUPPLEMENTARY DATA

\*Adjusted for age, sex, region of residence, duration of diabetes, history of macrovascular diseases, smoking habit, drinking habit, body mass index, HbA1c, total cholesterol, log-transformed triglycerides, estimated glomerular filtration rate (eGFR), systolic blood pressure (BP), log-transformed baseline urine albumin-to-creatinine ratio (UACR), change in systolic BP, change in eGFR and ADVANCE trial treatment allocation (randomized blood pressure lowering and glucose control)

**Supplemental Figure S7. Adjusted hazard ratios (HRs) and 95% confidence intervals (CIs) for study outcomes according to categorical change after multiple imputation of missing UACR and covariate information for patients initially excluded from the study cohort\***

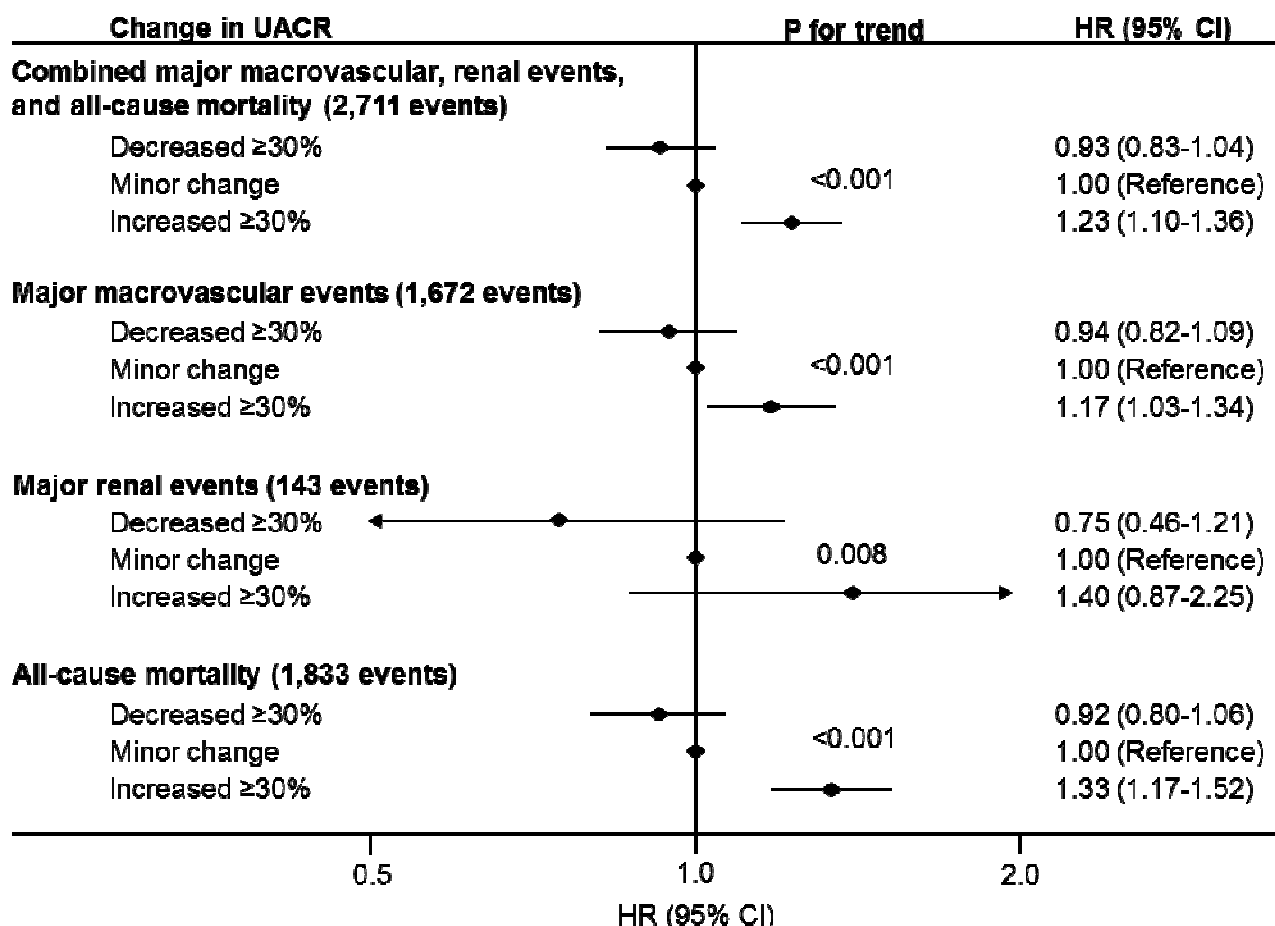

\*Adjusted for age, sex, region of residence, duration of diabetes, history of macrovascular diseases, smoking habit, drinking habit, body mass index, HbA1c, total cholesterol, log-transformed triglycerides, estimated glomerular filtration rate (eGFR), systolic blood pressure (BP), log-transformed baseline urine albumin-to-creatinine ratio (UACR), change in systolic BP, change in eGFR and ADVANCE trial treatment allocation (randomized blood pressure lowering and glucose control)
